# Supplementary material for: Carry-Over of Zearalenone and Its Metabolites to Intestinal Tissues and the Expression of CYP1A1 and GSTπ1 in the Colon of Gilts before Puberty
Source: MDPI journal article supplement (doi:10.3390/toxins14050354), 2022-05-18
Supplement: s1 [file s1]

# Supplementary Materials: Carry-Over of Zearalenone and Its Metabolites to Intestinal Tissues and the Expression of CYP1A1 and GST $\pi$ 1 in the Colon of Gilts before Puberty

Magdalena Mróz, Magdalena Gajęcka, Paweł Brzuzan, Sylwia Lisieska-Żołnierczyk, Dawid Leski, Łukasz Zielonka and Maciej T. Gajęcki

Task 4. Validation of chromatographic determination methods for zearalenone,  $\alpha$ -zearalenol and DON in pig feed

## Validation of the zearalenone (ZEN) determination method in wheat

The main points of QC-Quality Control:

LQC—low quality control—10  $\mu\text{g/kg}$

IQC—intermediate quality control—40  $\mu\text{g/kg}$

MQC—medium quality control—100  $\mu\text{g/kg}$

HQC—high quality kontrol—160  $\mu\text{g/kg}$

Method range: 5–200  $\mu\text{g/kg}$

### 1. Determination of precision and accuracy

LQC – 10  $\mu\text{g/kg}$

| Parameters                       | ZEN concentration $\mu\text{g/kg}$ |       |       |
|----------------------------------|------------------------------------|-------|-------|
| Average concentration on the day | 9.68                               | 9.69  | 10.08 |
| SD                               | 0.32                               | 0.29  | 0.38  |
| CV                               | 3.27                               | 3.04  | 3.82  |
| Bias %                           | -3.16                              | -3.10 | 0.80  |
| Number of samples                | 5                                  | 5     | 5     |
| Mean total concentration         | 9.82                               |       |       |
| Total SD                         | 0.36                               |       |       |
| CV % total                       | 3.71                               |       |       |
| Bias% total                      | -1.82                              |       |       |
| Number of samples                | 15                                 |       |       |

| Variant        | Sum of squares | Number of degrees of freedom | Variance | F    | p    |
|----------------|----------------|------------------------------|----------|------|------|
| During the day | 0.51           | 2                            | 0.25     | 2.30 | 0.14 |
| Between days   | 1.34           | 12                           | 0.11     |      |      |
| Total          | 1.85           | 14                           | 0.36     |      |      |

IQC – 40  $\mu\text{g/kg}$

| Parameters                       | ZEN concentration $\mu\text{g/kg}$ |       |       |
|----------------------------------|------------------------------------|-------|-------|
| Average concentration on the day | 39.65                              | 39.92 | 39.78 |

|                                 |       |       |      |
|---------------------------------|-------|-------|------|
| <b>SD</b>                       | 2.30  | 0.80  | 1.37 |
| <b>CV</b>                       | 0.75  | 2.01  | 3.44 |
| <b>Bias %</b>                   | -0.86 | -0.21 | 0.55 |
| <b>Number of samples</b>        | 5     | 5     | 5    |
| <b>Mean total concentration</b> | 39.78 |       |      |
| <b>Total SD</b>                 | 0.87  |       |      |
| <b>CV % total</b>               | 2.19  |       |      |
| <b>Bias% total</b>              | -0.54 |       |      |
| <b>Number of samples</b>        | 15    |       |      |

| Variant        | Sum of squares | Number of degrees of freedom | Variance | F    | p    |
|----------------|----------------|------------------------------|----------|------|------|
| During the day | 0.17           | 2                            | 0.08     | 0.09 | 0.90 |
| Between days   | 10.43          | 12                           | 0.86     |      |      |
| Total          | 10.60          | 14                           | 0.95     |      |      |

MQC – 100 µg/kg

| Parameters                       | ZEN concentration µg/kg |       |        |
|----------------------------------|-------------------------|-------|--------|
| Average concentration on the day | 91.52                   | 95.83 | 101.23 |
| SD                               | 3.92                    | 4.49  | 3.20   |
| CV                               | 4.28                    | 4.69  | 3.17   |
| Bias %                           | -8.48                   | -4.17 | 1.23   |
| Number of samples                | 5                       | 5     | 5      |
| Mean total concentration         | 96.19                   |       |        |
| Total SD                         | 5.47                    |       |        |
| CV % total                       | 5.69                    |       |        |
| Bias% total                      | -3.81                   |       |        |
| Number of samples                | 15                      |       |        |

| Variant        | Sum of squares | Number of degrees of freedom | Variance | F    | p    |
|----------------|----------------|------------------------------|----------|------|------|
| During the day | 236.30         | 2                            | 118.15   | 7.73 | 0.00 |
| Between days   | 183.30         | 12                           | 15.27    |      |      |
| Total          | 419.60         | 14                           | 133.42   |      |      |

HQC – 160 µg/kg

| Parameters | ZEN concentration µg/kg |
|------------|-------------------------|
|------------|-------------------------|

|                                         |        |        |        |
|-----------------------------------------|--------|--------|--------|
| <b>Average concentration on the day</b> | 158.47 | 163.23 | 157.52 |
| <b>SD</b>                               | 2.79   | 3.76   | 4.88   |
| <b>CV</b>                               | 1.76   | 2.30   | 3.10   |
| <b>Bias %</b>                           | -0.95  | 2.02   | -1.55  |
| <b>Number of samples</b>                | 5      | 5      | 5      |
| <b>Mean total concentration</b>         | 159.74 |        |        |
| <b>Total SD</b>                         | 4.44   |        |        |
| <b>CV % total</b>                       | 2.78   |        |        |
| <b>Bias% total</b>                      | -0.16  |        |        |
| <b>Number of samples</b>                | 15     |        |        |

| Variant        | Sum of squares | Number of degrees of freedom | Variance | F    | p    |
|----------------|----------------|------------------------------|----------|------|------|
| During the day | 93.62          | 2                            | 46.81    | 3.06 | 0.08 |
| Between days   | 183.07         | 12                           | 15.25    |      |      |
| <b>Total</b>   | 276.70         | 14                           | 62.06    |      |      |

## 2. Determination of linearity – study of linearity and bias

Correlation coefficient – 0.99

| Regression table                |                 |                         |                  |      |      |
|---------------------------------|-----------------|-------------------------|------------------|------|------|
| Parameter                       | Value           | Standard error          | Statistics t     | p    |      |
| Free word                       | -0.61           | 0.82                    | -0.73            | 0.46 |      |
| Inclination                     | -0.00           | 0.00                    | -0.76            | 0.44 |      |
| Table ANOVA                     |                 |                         |                  |      |      |
| Source                          | Sum of squares  | Degrees of freedom      | Medium square    | F    | p    |
| Regression                      | 8.48            | 1                       | 8.48             | 0.58 | 0.44 |
| Error                           | 845.03          | 58                      | 14.56            |      |      |
| Together                        | 853.52          | 59                      |                  |      |      |
| Materiality of a systemic error |                 |                         |                  |      |      |
| Part                            | Reference value | Average of measurements | Systematic error | p    |      |
| 1                               | 10              | 9.82                    | -0.18            | 0.09 |      |
| 2                               | 40              | 39.78                   | -0.21            | 0.44 |      |
| 3                               | 100             | 96.19                   | -3.80            | 0.01 |      |
| 4                               | 160             | 159.74                  | -0.26            | 0.84 |      |
| Average                         |                 |                         | -1.11            |      |      |

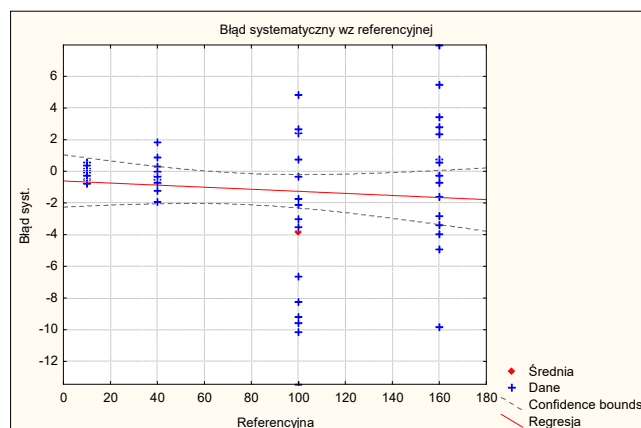

### 3. Determination of recovery

| Nominal concentration ZEN $\mu\text{g/kg}$ | Total ZEN recovery % | Average total recovery % | CV of total recovery |
|--------------------------------------------|----------------------|--------------------------|----------------------|
| LQC                                        | 96.84                | 98.18                    | 3.71                 |
|                                            | 96.90                |                          |                      |
|                                            | 100.80               |                          |                      |
| IQC                                        | 99.13                | 99.46                    | 2.19                 |
|                                            | 99.79                |                          |                      |
|                                            | 99.45                |                          |                      |
| MQC                                        | 91.52                | 96.19                    | 5.69                 |
|                                            | 95.83                |                          |                      |
|                                            | 101.23               |                          |                      |
| HQC                                        | 99.04                | 99.84                    | 2.78                 |
|                                            | 102.02               |                          |                      |
|                                            | 98.45                |                          |                      |
|                                            | Average              | 98.42                    | 3.59                 |

### 4. Determination LOD - limit of detection

The limit of detection was determined on the basis of 7 repetitions of the blank sample (ZEN-free serum). Then the average value was calculated and the value of 3 standard deviations was calculated. The limit of detection was the sum of the mean values and 3 standard deviations. The limit of detection was 2  $\mu\text{g/kg}$ .

### 5. Determination LOQ - the lowest limit of the quantitation

The limit of quantification was determined on the basis of 7 repetitions of the blank sample (ZEN-free serum). Then the average value was calculated and the value of 10 standard deviations was calculated. The limit of quantification is the sum of the mean values and 10 standard deviations. The limit of quantification was 5 µg/kg.

#### Calibration of the method for the determination of $\alpha$ -zearalenol ( $\alpha$ -ZEL) in wheat

The main points of QC-Quality Control:

LQC-low quality control-10 µg/kg

IQC-intermediate quality control-40 µg/kg

MQC-medium quality control-100 µg/kg

HQC-high quality kontrol-160 µg/kg

Method range: 5–200 µg/kg

#### 1. Determination of precision and accuracy

LQC – 10 µg/kg

| Parameters                       | Concentration $\alpha$ -ZEL µg/kg |       |       |
|----------------------------------|-----------------------------------|-------|-------|
| Average concentration on the day | 10.49                             | 9.88  | 10.22 |
| SD                               | 0.21                              | 0.33  | 0.55  |
| CV                               | 2.09                              | 3.33  | 5.36  |
| Bias %                           | 4.94                              | -1.18 | 2.18  |
| Number of samples                | 5                                 | 5     | 5     |
| Mean total concentration         | 10.20                             |       |       |
| Total SD                         | 0.44                              |       |       |
| CV % total                       | 4.36                              |       |       |
| Bias% total                      | 1.98                              |       |       |
| Number of samples                | 15                                |       |       |

| Variant        | Sum of squares | Number of degrees of freedom | Variance | F    | p    |
|----------------|----------------|------------------------------|----------|------|------|
| During the day | 0.93           | 2                            | 0.46     | 3.08 | 0.08 |
| Between days   | 1.82           | 12                           | 0.15     |      |      |
| Total          |                | 14                           |          |      |      |

IQC – 40 µg/kg

| Parameters                       | Concentration $\alpha$ -ZEL µg/kg |       |       |
|----------------------------------|-----------------------------------|-------|-------|
| Average concentration on the day | 43.60                             | 42.25 | 41.82 |
| SD                               | 0.99                              | 0.92  | 0.97  |
| CV                               | 2.26                              | 2.17  | 2.31  |
| Bias %                           | 9.00                              | 5.63  | 4.55  |
| Number of samples                | 5                                 | 5     | 5     |
| Mean total concentration         | 42.56                             |       |       |
| Total SD                         | 1.18                              |       |       |
| CV % total                       | 2.78                              |       |       |
| Bias% total                      | 6.39                              |       |       |
| Number of samples                | 15                                |       |       |

| Variant        | Sum of squares | Number of degrees of freedom | Variance | F    | p    |
|----------------|----------------|------------------------------|----------|------|------|
| During the day | 8.64           | 2                            | 4.32     | 4.71 | 0.03 |
| Between days   | 11.00          | 12                           | 0.91     |      |      |
| Total          | 19.64          | 14                           | 5.23     |      |      |

MQC – 100 µg/kg

| Parameters                       | Concentration $\alpha$ -ZEL µg/kg |       |       |
|----------------------------------|-----------------------------------|-------|-------|
| Average concentration on the day | 100.26                            | 95.62 | 98.15 |
| SD                               | 2.78                              | 4.94  | 4.04  |
| CV                               | 2.77                              | 5.17  | 4.11  |
| Bias %                           | 0.26                              | -4.38 | -1.85 |
| Number of samples                | 5                                 | 5     | 5     |
| Mean total concentration         | 98.01                             |       |       |
| Total SD                         | 4.21                              |       |       |
| CV % total                       | 4.29                              |       |       |
| Bias% total                      | -1.99                             |       |       |
| Number of samples                | 15                                |       |       |

| Variant        | Sum of squares | Number of degrees of freedom | Variance | F    | p    |
|----------------|----------------|------------------------------|----------|------|------|
| During the day | 53.92          | 2                            | 26.96    | 1.66 | 0.22 |
| Between days   | 193.84         | 12                           | 16.15    |      |      |
| Total          | 247.76         | 14                           | 43.11    |      |      |

HQC – 160 µg/kg

| Parameters                       | Concentration $\alpha$ -ZEL<br>µg/kg |        |        |
|----------------------------------|--------------------------------------|--------|--------|
|                                  |                                      |        |        |
| Average concentration on the day | 162.59                               | 158.87 | 156.01 |
| SD                               | 3.40                                 | 4.05   | 2.47   |
| CV                               | 2.09                                 | 2.55   | 1.58   |
| Bias %                           | 1.62                                 | -0.71  | -2.49  |
| Number of samples                | 5                                    | 5      | 5      |
| Mean total concentration         | 159.16                               |        |        |
| Total SD                         | 4.18                                 |        |        |
| CV % total                       | 2.63                                 |        |        |
| Bias% total                      | -0.53                                |        |        |
| Number of samples                | 15                                   |        |        |

| Variant        | Sum of squares | Number of degrees of freedom | Variance | F    | p    |
|----------------|----------------|------------------------------|----------|------|------|
| During the day | 108.93         | 2                            | 54.46    | 4.79 | 0.02 |
| Between days   | 136.32         | 12                           | 11.36    |      |      |
| Total          | 245.26         | 14                           | 65.82    |      |      |

## 2. Determination of linearity – study of linearity and bias

Correlation coefficient – 0.99

| Regression table                |                |                    |               |      |      |
|---------------------------------|----------------|--------------------|---------------|------|------|
| Parameter                       | Value          | Standard error     | Statistics t  | p    |      |
| Free word                       | 1.28           | 0.71               | 0.80          | 0.07 |      |
| Inclination                     | -0.01          | 0.00               | -2.28         | 0.02 |      |
| Table ANOVA                     |                |                    |               |      |      |
| Source                          | Sum of squares | Degrees of freedom | Medium square | F    | p    |
| Regression                      | 56.45          | 1                  | 56.45         | 5.21 | 0.02 |
| Error                           | 627.73         | 58                 | 10.82         |      |      |
| Together                        | 684.19         | 59                 | 67.28         |      |      |
| Materiality of a systemic error |                |                    |               |      |      |

| Part    | Reference value | Average of measurements | Systematic error | p    |  |
|---------|-----------------|-------------------------|------------------|------|--|
| 1       | 10              | 10.20                   | -0.19            | 0.05 |  |
| 2       | 40              | 42.56                   | 2.55             | 0.00 |  |
| 3       | 100             | 98.01                   | -1.99            | 0.07 |  |
| 4       | 160             | 159.16                  | -0.84            | 0.39 |  |
| Average |                 |                         | -0.01            |      |  |

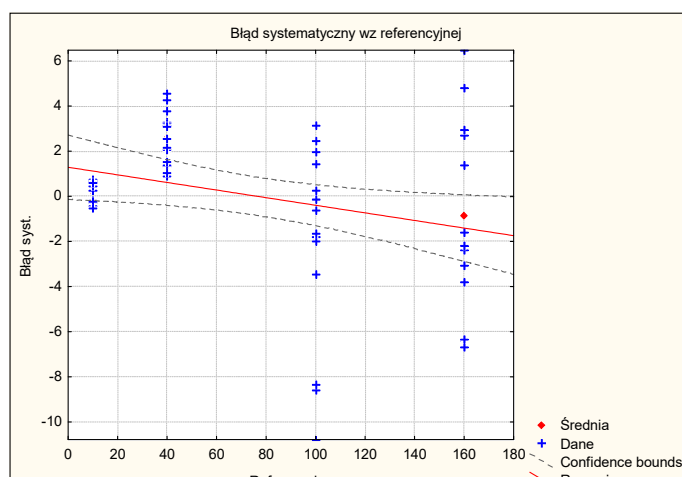

### 3. Determination of recovery

| Nominal concentration $\alpha$ -ZEL<br>$\mu\text{g/kg}$ | Total recovery $\alpha$ -<br>ZEL % | Average total<br>recovery % | CV of total<br>recovery |
|---------------------------------------------------------|------------------------------------|-----------------------------|-------------------------|
| LQC                                                     | 104.94                             | 101.98                      | 4.36                    |
|                                                         | 98.82                              |                             |                         |
|                                                         | 102.18                             |                             |                         |
| IQC                                                     | 109.00                             | 106.39                      | 2.74                    |
|                                                         | 105.63                             |                             |                         |
|                                                         | 104.55                             |                             |                         |
| MQC                                                     | 100.26                             | 98.01                       | 4.29                    |



|     |         |        |      |
|-----|---------|--------|------|
|     | 95.62   |        |      |
|     | 98.15   |        |      |
| HQC | 101.62  | 99.47  | 2.63 |
|     | 99.29   |        |      |
|     | 97.51   |        |      |
|     | Average | 101.46 | 3.50 |

#### 4. Determination LOD - limit of detection

The limit of detection was determined on the basis of 7 repetitions of the blank sample (wheat free of  $\alpha$ -ZEL). Then the average value was calculated and the value of 3 standard deviations was calculated. The limit of detection was the sum of the mean values and 3 standard deviations. The limit of detection was 3  $\mu\text{g/kg}$ .

#### 5. Determination LOQ - the lowest limit of the quantitation

The limit of quantification was determined on the basis of 7 repetitions of the blank sample (wheat free of  $\alpha$ -ZEL). Then the average value was calculated and the value of 10 standard deviations was calculated. The limit of quantification is the sum of the mean values and 10 standard deviations. The limit of quantification was 5  $\mu\text{g/kg}$ .

### Validation of the method for the determination of deoxynivalenol (DON) in wheat

The main points of QC-Quality Control:

LQC-low quality control-100  $\mu\text{g/kg}$

IQC-intermediate quality control-500  $\mu\text{g/kg}$

MQC-medium quality control-2500  $\mu\text{g/kg}$

HQC-high quality kontrol-4000  $\mu\text{g/kg}$

Method range: 25–5000  $\mu\text{g/kg}$

#### 1. Determination of precision and accuracy

LQC – 100  $\mu\text{g/kg}$

| Parameters                       | DON concentration µg/kg |        |        |
|----------------------------------|-------------------------|--------|--------|
| Average concentration on the day | 107.00                  | 103.56 | 106.65 |
| SD                               | 3.33                    | 2.64   | 4.35   |
| CV                               | 3.12                    | 2.55   | 4.08   |
| Bias %                           | 7.00                    | 3.56   | 6.65   |
| Number of samples                | 5                       | 5      | 5      |
| Mean total concentration         | 105.74                  |        |        |
| Total SD                         | 3.63                    |        |        |
| CV % total                       | 3.43                    |        |        |
| Bias% total                      | 5.74                    |        |        |
| Number of samples                | 15                      |        |        |

| Variant        | Sum of squares | Number of degrees of freedom | Variance | F    | p    |
|----------------|----------------|------------------------------|----------|------|------|
| During the day | 35.95          | 2                            | 17.98    | 1.45 | 0.27 |
| Between days   | 148.30         | 12                           | 12.36    |      |      |
| Total          | 184.25         | 14                           | 30.34    |      |      |

IQC – 500 µg/kg

| Parameters                       | Concentration 500 µg/kg |        |        |
|----------------------------------|-------------------------|--------|--------|
| Average concentration on the day | 508.78                  | 502.83 | 501.67 |
| SD                               | 7.73                    | 4.96   | 8.36   |
| CV                               | 1.52                    | 0.99   | 1.67   |
| Bias %                           | 1.75                    | 0.56   | 0.33   |
| Number of samples                | 5                       | 5      | 5      |
| Mean total concentration         | 504.42                  |        |        |
| Total SD                         | 7.38                    |        |        |
| CV % total                       | 1.46                    |        |        |
| Bias% total                      | 0.88                    |        |        |
| Number of samples                | 15                      |        |        |

| Variant        | Sum of squares | Number of degrees of freedom | Variance | F    | p    |
|----------------|----------------|------------------------------|----------|------|------|
| During the day | 145.39         | 2                            | 72.70    | 1.41 | 0.28 |
| Between days   | 617.00         | 12                           | 51.42    |      |      |
| Total          |                | 14                           |          |      |      |

MQC – 2500 µg/kg

| Parameters                       | Concentration 2500 µg/kg |         |         |
|----------------------------------|--------------------------|---------|---------|
| Average concentration on the day | 2396.55                  | 2423.85 | 2462.87 |
| SD                               | 55.22                    | 37.57   | 25.32   |
| CV                               | 2.30                     | 1.55    | 1.03    |
| Bias %                           | -4.14                    | -3.05   | -1.48   |
| Number of samples                | 5                        | 5       | 5       |
| Mean total concentration         | 2427.76                  |         |         |
| Total SD                         | 47.45                    |         |         |
| CV % total                       | 1.95                     |         |         |
| Bias% total                      | -2.89                    |         |         |
| Number of samples                | 15                       |         |         |

| Variant        | Sum of squares | Number of degrees of freedom | Variance  | F    | p    |
|----------------|----------------|------------------------------|-----------|------|------|
| During the day | 11107.75       | 2                            | 5553.87   | 3.26 | 0.07 |
| Between days   | 20410.10       | 12                           | 1700.84   |      |      |
| Total          | 31517.85       | 14                           | 175637.87 |      |      |

HQC – 4000 µg/kg

| Parameters                       | DON concentration<br>µg/kg |         |         |
|----------------------------------|----------------------------|---------|---------|
| Average concentration on the day | 3063.04                    | 3201.48 | 3190.96 |
| SD                               | 159.03                     | 217.17  | 179.19  |
| CV                               | 5.19                       | 6.78    | 5.61    |
| Bias %                           | -23.42                     | -19.96  | -20.23  |
| Number of samples                | 5                          | 5       | 5       |
| Mean total concentration         | 3151.83                    |         |         |
| Total SD                         | 184.71                     |         |         |
| CV % total                       | 5.86                       |         |         |
| Bias% total                      | -21.20                     |         |         |
| Number of samples                | 15                         |         |         |

| Variant        | Sum of squares | Number of degrees of freedom | Variance | F    | P    |
|----------------|----------------|------------------------------|----------|------|------|
| During the day | 59399.15       | 2                            | 29699.57 | 0.85 | 0.45 |
| Between days   | 418271.20      | 12                           | 34855.94 |      |      |
| Total          | 477670.35      | 14                           | 64555.51 |      |      |

## 2nd Determination of linearity – study of linearity and bias

Correlation coefficient – 0.999

| Regression table                |                 |                         |                  |        |      |
|---------------------------------|-----------------|-------------------------|------------------|--------|------|
| Parameter                       | Value           | Standard error          | Statistics t     | p      |      |
| Free word                       | 122.65          | 40.30                   | 3.04             | 0.00   |      |
| Inclination                     | -0.19           | 0.01                    | -11.61           | 0.00   |      |
| Table ANOVA                     |                 |                         |                  |        |      |
| Source                          | Sum of squares  | Degrees of freedom      | Medium square    | F      | p    |
| Regression                      | 5785472.84      | 1                       | 5785472.84       | 134.89 | 0.00 |
| Error                           | 2487601.97      | 58                      | 42889.68         |        |      |
| Together                        | 8273074.81      | 59                      |                  |        |      |
| Materiality of a systemic error |                 |                         |                  |        |      |
| Part                            | Reference value | Average of measurements | Systematic error | p      |      |
| 1                               | 100             | 105.74                  | 5.73             | 0.00   |      |
| 2                               | 500             | 504.42                  | 4.42             | 0.03   |      |
| 3                               | 2500            | 2427.75                 | -72.24           | 0.00   |      |
| 4                               | 4000            | 3151.83                 | -848.17          | 0.00   |      |
| Average                         |                 |                         | -227.56          |        |      |

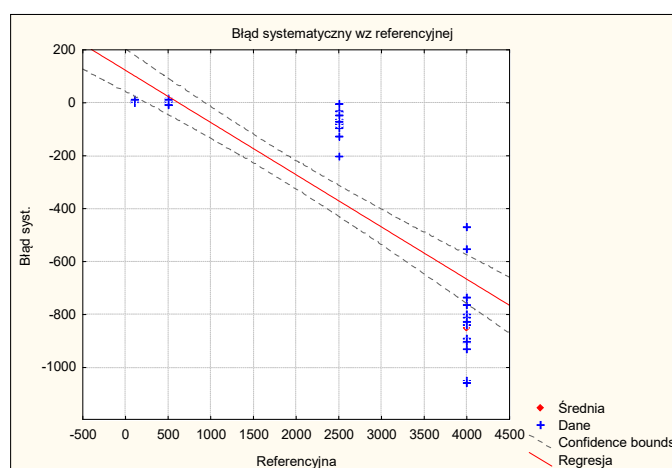

### 3. Determination of recovery

| Nominal concentration of DON<br>µg/kg | Total recovery of<br>DON % | Average total<br>recovery % | CV of total<br>recovery |
|---------------------------------------|----------------------------|-----------------------------|-------------------------|
| LQC                                   | 107.00                     | 105.74                      | 3.43                    |
|                                       | 103.56                     |                             |                         |
|                                       | 106.65                     |                             |                         |
| IQC                                   | 101.75                     | 100.88                      | 1.46                    |
|                                       | 100.56                     |                             |                         |
|                                       | 100.33                     |                             |                         |
| MQC                                   | 95.86                      | 97.11                       | 1.95                    |
|                                       | 96.95                      |                             |                         |
|                                       | 98.51                      |                             |                         |
| HQC                                   | 76.58                      | 78.80                       | 5.86                    |
|                                       | 80.04                      |                             |                         |
|                                       | 79.77                      |                             |                         |
| Average                               |                            | 95.63                       | 2.69                    |

### 4. Determination LOD - limit of detection

The limit of detection was determined on the basis of 7 repetitions of a blank sample (DON-free wheat). Then the average value was calculated and the value of 3 standard deviations was calculated. The limit of detection was the sum of the mean values and 3 standard deviations. The limit of detection was 14 µg/kg.

### 5. Determination LOQ - the lowest limit of the quantitation

The limit of quantification was determined on the basis of 7 repetitions of the blank sample (DON-free wheat). Then the average value was calculated and the value of 10 standard deviations was calculated. The limit of quantification is the sum of the mean values and 10 standard deviations. The limit of quantification was 20 µg/kg.

### Summary

The validation showed that in all tested control points for ZEN,  $\alpha$ -ZEL and DON (LQC, IQC, MQC, HQC) within the batch (day of performing the determinations) and between batches (between days of determinations) the acceptance criteria for precision (BIAS% - systematic error of the method – did not exceed  $\pm 15\%$ ), accuracy (the coefficient of variation CV did not exceed  $\pm 15\%$ ), the linearity of the method was maintained (correlation curve for each of

the analytes above  $r = 0.99$ ), the average total % recovery was above 90%. For individual mycotoxins, the limit of detection (LOD) and the limit of quantification (LOQ) were determined.
